# Supplementary material
Source: ML conference proceedings conference paper supplement (https://openaccess.thecvf.com/content/CVPR2026/html/Xiang_Fine-Grained_Post-Training_Quantization_CVPR_2026_paper.html)
Supplement: Supplementary file 1 [file Xiang_Fine-Grained_Post-Training_Quantization_CVPR_2026_supplemental.pdf]

# Fine-Grained Post-Training Quantization for Large Vision Language Models with Quantization-Aware Integrated Gradients

## Supplementary Material

### A. Proof of Quantization-Aware Integrated Gradients Completeness

We denote the input as  $x = [x_1, \dots, x_T]$ , where each token embedding  $x_i \in \mathbb{R}^d$ . Thus the full input lies in  $\mathbb{R}^{T \times d}$ . Using the definition of QIG in Eq. 3, the attribution for the  $i$ -th token is defined as:

$$\text{QIG}_i(x) = (x_i - x_i^q) \int_0^1 \frac{\partial (f(x_\alpha, w) - f(x_\alpha, w^q))}{\partial x_i} d\alpha, \quad (8)$$

where  $x_\alpha = x^q + \alpha(x - x^q)$  is the linear interpolation between the quantized input  $x^q$  and the original input  $x$ .

To simplify the notation, we define the quantization-error function as:

$$G(x) = f(x, w) - f(x, w^q). \quad (9)$$

Under this definition, QIG becomes standard Integrated Gradients (IG) applied to  $G(\cdot)$  with baseline  $x^q$ :

$$\text{QIG}_i(x) = (x_i - x_i^q) \int_0^1 \frac{\partial G(x_\alpha)}{\partial x_i} d\alpha. \quad (10)$$

**Completeness.** Consider the interpolation path  $\gamma(\alpha) = x_\alpha = x^q + \alpha(x - x^q)$ . Since the path is linear, the derivative with respect to  $\alpha$  can be written as:

$$\frac{\partial x_\alpha}{\partial \alpha} = x - x^q. \quad (11)$$

Applying the chain rule to  $G(\gamma(\alpha))$  yields:

$$\begin{aligned} \frac{\partial}{\partial \alpha} G(x_\alpha) &= \nabla_x G(x_\alpha)^\top \frac{\partial x_\alpha}{\partial \alpha} \\ &= \nabla_x G(x_\alpha)^\top (x - x^q) \\ &= \sum_{i=1}^T (x_i - x_i^q) \frac{\partial G(x_\alpha)}{\partial x_i}, \end{aligned} \quad (12)$$

which shows that the weighted coordinate-wise gradients in QIG correspond to the directional derivative of  $G$  along the interpolation path.

Integrating both sides from  $\alpha = 0$  to 1, and using  $G(\gamma(0)) = G(x^q)$  and  $G(\gamma(1)) = G(x)$ , the fundamental theorem of calculus gives:

$$\begin{aligned} G(x) - G(x^q) &= \int_0^1 \frac{\partial}{\partial \alpha} G(x_\alpha) d\alpha \\ &= \sum_{i=1}^T (x_i - x_i^q) \int_0^1 \frac{\partial G(x_\alpha)}{\partial x_i} d\alpha. \end{aligned} \quad (13)$$

Recognizing the definition of  $\text{QIG}_i(x)$ , we obtain the completeness property:

$$\begin{aligned} \sum_{i=1}^T \text{QIG}_i(x) &= G(x) - G(x^q) \\ &= [f(x, w) - f(x, w^q)] \\ &\quad - [f(x^q, w) - f(x^q, w^q)]. \end{aligned} \quad (14)$$

**Discussion.** When the baseline satisfies  $G(x^q) = 0$  (e.g., when  $f(x^q, w) = f(x^q, w^q)$ ), the completeness relation simplifies to:

$$\sum_{i=1}^T \text{QIG}_i(x) = f(x, w) - f(x, w^q), \quad (15)$$

which mirrors the classical IG completeness property. In practice, post-processing of QIG values (e.g., clipping or interquartile-range filtering) may slightly break strict algebraic completeness while improving numerical stability and visualization quality.

### B. More Implementation Details

**QIG objective implementation.** Let  $x \in \mathbb{R}^{B \times T \times H}$  be the pre-residual activation of the current block, and let  $x^q$  be its quantized version. The block outputs are denoted as  $y_{\text{fp}} = f(x, w)$  and  $y_{\text{q}} = f(x, w^q)$ . We define the per-token quantization distortion error as:

$$E_{b,t}(x) = \frac{1}{H} \sum_{h=1}^H |(y_{\text{fp}} - y_{\text{q}})_{b,t,h}|, \quad E(x) \in \mathbb{R}^{B \times T}.$$

To obtain QIG attributions, we approximate the gradients of this quantization distortion loss  $E_{b,t}(x)$  using 32-step integrated gradients [34]. Specifically, we integrate along the straight-line path from the baseline  $x^q$  to the input  $x$ , defined as  $x(\alpha) = x^q + \alpha(x - x^q)$  for  $\alpha \in [0, 1]$ . Crucially, this computation is performed directly on the difference function  $\|f(x) - f_q(x)\|$ , without separately computing or subtracting gradients from the full-precision and quantized models individually. This follows the construction described in Appendix A, where  $E_{b,t}(x)$  serves as the scalar target function for attribution.

**Quantization Formats.** We adopt uniform integer quantization for all experiments, and quantize both the weights  $W$  and the input activations  $X$  of each linear layer. For a given tensor  $T$  and bit-width  $b$ , we denote its quantized integer representation by  $Q(T) \in \mathbb{Z}^b$  and the corresponding dequantized value by  $\hat{T}$ .

For weight-only quantization, we apply asymmetric, group-wise quantization to the weight matrix  $W$ . Each row of  $W$  is partitioned into non-overlapping groups of size 128, and for each group  $g$  we compute a scale  $s_g$  and zero-point  $z_g$  from the group-wise minimum and maximum:

$$s_g = \frac{\max(W_g) - \min(W_g)}{2^b - 1}, \quad (16)$$

$$z_g = \text{round}\left(-\frac{\min(W_g)}{s_g}\right). \quad (17)$$

The integer weights are then obtained as:

$$Q(W_g) = \text{clip}\left(\text{round}(W_g/s_g) + z_g, 0, 2^b - 1\right), \quad (18)$$

and the dequantized weights are  $\hat{W}_g = s_g(Q(W_g) - z_g)$ . We primarily use  $b \in \{3, 4\}$ , which we denote as  $W3$  and  $W4$ .

For weight-activation quantization, we use symmetric quantization for both weights and activations. Given a tensor  $T$  and bit-width  $b$ , we define:

$$s_T = \frac{\max(|T|)}{2^{b-1} - 1}, \quad (19)$$

$$Q(T) = \text{clip}(\text{round}(T/s_T), -2^{b-1}, 2^{b-1} - 1),$$

and  $\hat{T} = s_T Q(T)$ . In this setting we write  $WxAy$  to indicate  $x$ -bit weight and  $y$ -bit activation quantization, e.g.,  $W4A8$  for 4-bit weights and 8-bit activations. Unless otherwise stated, the group size for weight quantization is fixed to 128.

### C. More Experimental Results

**Effectiveness of IQR-Based Clipping.** To more comprehensively evaluate the robustness benefits introduced by our IQR-based clipping strategy, we conduct an ablation study comparing four sensitivity stabilization variants: (1) No Clipping, which directly uses raw token-level sensitivities; (2) Top-5 Zero, which suppresses the five largest sensitivity values by setting them to zero; (3) Top-5 Average, which replaces the five largest sensitivities with the global mean computed over all token sensitivities; and (4) our full IQR Clipping method, which attenuates extreme values using statistically grounded interquartile-range thresholds.

| Method              | VizWiz | MMMU  | ScienceQA |
|---------------------|--------|-------|-----------|
| No Clipping         | 54.32  | 41.37 | 93.28     |
| Top5 zero           | 57.20  | 43.56 | 94.10     |
| Top5 average        | 57.25  | 44.78 | 94.18     |
| IQR Clipping (Ours) | 59.10  | 45.00 | 94.25     |

Table A1. Ablation on sensitivity stabilization strategies. Our IQR Clipping achieves the best overall performance on LLaVA-OneVision-7B under W4A8 quantization.

|        | PPL↓ | PIQA↑ | ARC-e↑ | ARC-c↑ | MMLU↑ |
|--------|------|-------|--------|--------|-------|
| GPTQ   | 6.24 | 75.46 | 67.00  | 40.10  | 30.05 |
| + Ours | 6.19 | 75.95 | 67.17  | 39.85  | 32.01 |

Table A2. Comparison of GPTQ and Our Fine-Grained Quantization on LLaMA-2-7B (3bit).

As shown in Tab. A1, all clipping strategies improve performance relative to the raw-sensitivity baseline, highlighting the importance of controlling outlier sensitivities. Notably, modifying the importance allocation of only five tokens already leads to clear performance differences, underscoring the necessity of fine-grained, token-level importance estimation. Among all variants, our IQR-based approach achieves the best results across VizWiz, MMMU, and ScienceQA, demonstrating that the observed gains originate not merely from simple top-value replacement, but from a distribution-aware clipping mechanism that more effectively stabilizes the sensitivity distribution.

**Extension to Large Language Models (LLMs).** To verify that our method’s effectiveness stems from accurately measuring token-level sensitivity rather than serving as a simple modality-related replacement, we further extend our approach to LLMs. Tab. A2 reports results with quantized LLaMA-2 on several standard language understanding benchmarks, including perplexity (PPL), PIQA for physical commonsense reasoning, ARC-e/ARC-c for scientific question answering, and MMLU for multi-domain knowledge understanding. As shown in Tab. A2, our fine-grained quantization method not only performs strongly on LVLMs but also achieves notable improvements when applied to LLMs. Specifically, by leveraging QIG to model token-level sensitivity, we attain superior quantization performance across different modalities and model types. This capability to capture fine-grained token sensitivity makes our method highly versatile, enabling consistent performance gains across various large-scale pre-trained models, including both multimodal and unimodal settings.

| Bitwidth | Calib. Size | Method | DocVQA | ChartQA | OCRBench | Avg.  |
|----------|-------------|--------|--------|---------|----------|-------|
| W4A8     | 128         | MBQ    | 84.48  | 77.28   | 70.60    | 77.45 |
|          |             | Ours   | 88.60  | 77.52   | 76.80    | 80.97 |
|          | 256         | MBQ    | 84.87  | 76.68   | 71.50    | 77.68 |
|          |             | Ours   | 89.13  | 77.04   | 77.00    | 81.06 |

Table A3. Results on Qwen2-VL-7B using OCR-specific calibration data. Our method shows significant robustness improvements over MBQ in text-rich scenarios.

**Robustness with OCR-Specific Calibration.** To address concerns regarding the method’s adaptability to domain-specific challenges, we evaluate our approach using an OCR-focused calibration set derived from InfoVQA data. Tab. A3 reports the performance on Qwen2-VL-7B under W4A8 quantization across three OCR-intensive benchmarks: DocVQA, ChartQA, and OCRBench. As shown in the table, our method consistently outperforms the MBQ baseline across all calibration sizes (128 and 256 samples). Specifically, with only 128 calibration samples, our approach achieves an average improvement of 3.52% over MBQ, with notable gains of +4.12% on DocVQA and +6.20% on OCRBench. Even as the calibration size increases to 256, our method maintains a significant lead (avg. +3.38%). These results demonstrate that our token-level sensitivity modeling effectively captures critical features for text-rich visual understanding, ensuring robustness even when calibration data is limited or domain-specific.

## D. Visualizations

In this section, we provide extended visualizations to further analyze the conversational outputs of vision-language models under different quantization schemes. The comparative results, visually shown in Figs. A1–A4, indicate that our proposed fine-grained quantization strategy enables the quantized model’s responses to better align with the calibration data, effectively reducing degradation in reasoning quality, visual detail retention, and linguistic coherence, thereby more clearly demonstrating its advantages over modality-based baseline methods.

### Example 1 LLava onevision-7B W3A16

**Question:** Which classic film does this iconic scene on the ship's bow come from?

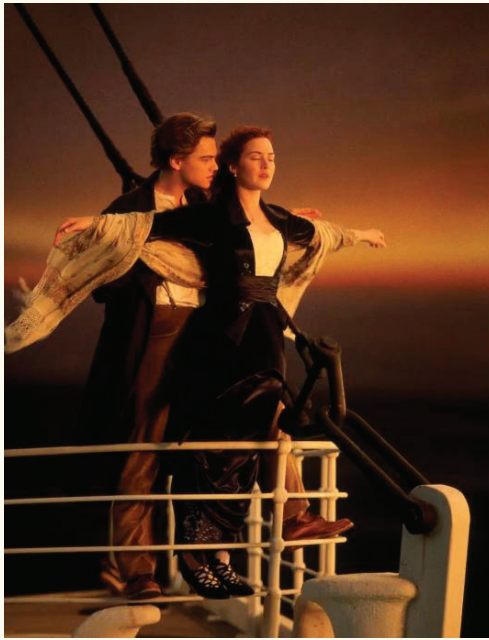

**FP16 Response:** Titanic

**MBQ Response:** Film

**Ours Response:** Titanic

Figure A1. The baseline fails to identify the film and produces an incomplete answer, whereas our fine-grained quantization successfully preserves the correct semantic prediction and matches the full-precision model.

## Example 2 LLava onevision-7B W4A8

**Question:** Is the motorcycle currently stationary or moving?  
Give exactly two visual cues from the image to justify your choice

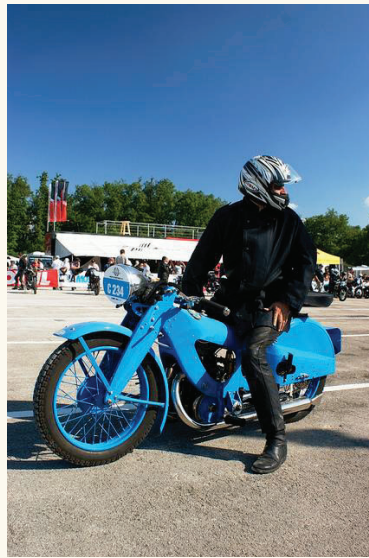

**FP16 Response:** The lack of blur suggests that the motorcycle is stationary.

**MBQ Response:** Motorcycle

### Does not answer the question or give visual cues

**Ours Response:** Motorcycle is stationary\nThe motorcycle's kickstand is down, indicating that it is parked and not moving. Additionally, the rider's foot is resting on the ground next to the motorcycle, which suggests that they are stationary rather than riding away or preparing to ride.

Figure A2. The baseline fails to answer the question and provides no reasoning, whereas our fine-grained quantization preserves both correctness and detailed visual justification, closely matching the full-precision model.

### Example 3 Internvl2-8B W4A8

**Question:** Describe the image in detail.

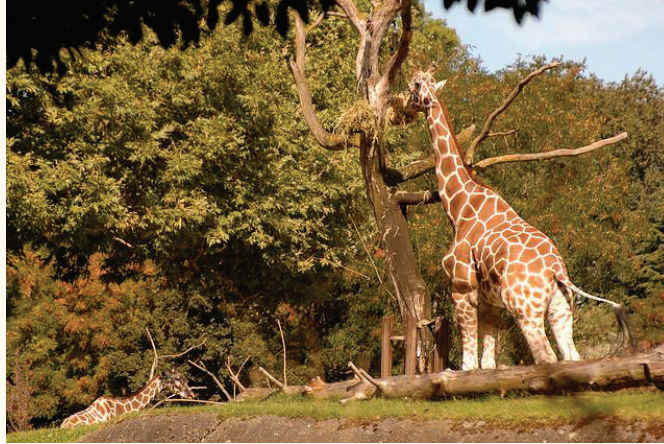

**FP16 Response:** The image depicts a scene in a natural or zoo setting, featuring two giraffes. The giraffes are standing on a grassy area with a backdrop of lush green trees and foliage. The giraffe in the foreground is standing on a log, reaching up to a tree branch with its long neck to feed on the leaves. The second giraffe is positioned slightly behind and to the left, also feeding on the tree. Both giraffes have characteristic long necks, spotted coats, and are standing on all four legs. The environment appears to be a serene and natural habitat, possibly a zoo or a wildlife reserve, designed to mimic the giraffes' natural environment.

**MBQ Response:** animal species, including giraffes. The image captures a moment of natural beauty and wildlife, showcasing the grace and elegance of these majestic animals.

### Missing detail

**Ours Response:** The image depicts a scene in what appears to be a naturalistic enclosure, likely a zoo or wildlife sanctuary. The primary focus is on two giraffes, which are tall, slender, and have long necks. The giraffes are standing on a grassy area, with one of them standing on a fallen tree branch, which is a common behavior for these animals as they use their height to reach higher foliage for food. The giraffes are surrounded by a lush, green environment. There are several trees with dense foliage, providing a natural and shaded habitat. The trees have broad leaves, which are typical of deciduous forests. The ground is covered in grass, and there are fallen branches and logs, contributing to the naturalistic setting. In the background, the image shows more trees and greenery, suggesting that the enclosure is quite expansive. The lighting in the image is natural, indicating that the photo was likely taken during the day. The overall ambiance is serene and peaceful, emphasizing the natural behavior and habitat of the giraffes. The giraffes are the central subjects, and their interaction with the environment, such as standing on the fallen tree branch, highlights their adaptability and natural foraging habits. The image captures a moment of their daily routine, showcasing their grace and elegance.

Figure A3. The baseline provides only a minimal and overly generic description, missing most visual details, whereas our fine-grained quantization preserves rich scene understanding and produces a comprehensive description close to the full-precision model.

#### Example 4 Internvl2-8B W3A16

**Question:** Describe the image in detail.

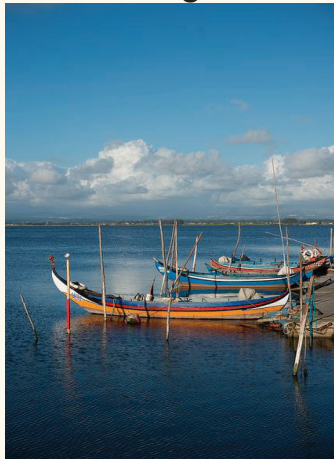

**FP16 Response:** The image depicts a serene harbor scene with several traditional fishing boats docked along the shore. The boats are painted in vibrant colors, primarily blue and red, with some featuring intricate designs. The boats are equipped with tall masts and rigging, indicating they are likely used for sailing. The water is calm, reflecting the boats and the partly cloudy sky above. The horizon is visible in the distance, with a gentle gradient from the blue of the sky to the green of the land. The overall atmosphere is peaceful and picturesque, capturing a moment of tranquility in a coastal setting

**MBQ Response:** and rustic charm, capturing a quiet moment in the life of a small fishing community. The careful arrangement of the boats and the harmonious blend of colors and natural elements create a visually pleasing and inviting scene.

### Missing detail

**Ours Response:** The image depicts a serene and picturesque harbor scene. The focal point is a cluster of small, colorful boats, likely fishing boats, moored side by side on a wooden dock. The boats are adorned with vibrant blue and red stripes, adding a splash of color to the tranquil waters. The boats are equipped with tall, slender masts, and their sails are neatly furled and tied, suggesting they are not currently in use. The water in the harbor is calm, reflecting the clear blue sky and the fluffy, white clouds that dot the horizon. The sky is mostly clear, with only a few scattered clouds, contributing to the overall peaceful and inviting atmosphere. The horizon line is visible in the distance, where the calm sea meets the sky. To the left of the image, there are a few more wooden posts or mooring poles, some of which are partially submerged in the water. These posts are likely used to secure the boats to the dock. The dock itself appears to be made of wood, blending harmoniously with the natural surroundings. The image captures a moment of quiet repose, with the boats gently rocking in the gentle ripples of the water. The scene is devoid of any human activity, emphasizing the stillness and beauty of the harbor. The overall composition of the image, with its balanced use of color and light, creates a visually pleasing and idyllic coastal setting.

Figure A4. The baseline produces an incomplete and overly generic description that misses key scene elements, whereas our fine-grained quantization preserves detailed coastal features and provides a rich interpretation closely aligned with the full-precision model.
